# Supplementary material for: Tungsten–niobium–sulfur composite nanotubes
Source: Royal Society of Chemistry journal article supplement (doi:10.1039/b007074m), 2001-01-01
Supplement: b007074m2.doc [file b007074m2.doc]

**ESI file**

Table 1 Raman bands of W0.9Nb0.1S2 and WS2 nanotubes and their assignments. 0 = excitation wavelength.

| **W0.9Nb0.1S2 nanotubes**  Band wavenumber/cm-1  0 = 632.8 nm 0 = 514.5 nm | **WS2 nanotubes**  Band wavenumber/cm-1  0 = 632.8 nm 0 = 514.5 nm | Assignment |
| --- | --- | --- |
|  | 153 w |  |
| 175 w 173 w | 175 m 173 w | LA (M) |
| 194 w 192 w | 194 m |  |
| 213 w | 213 w |  |
| 232 m | 232 m 233 w | a1g – 194 |
| 266 w | 266 w | e1g – 2e2g2 |
| 297 m 297 w | 296 m 297 w | e1g – e2g2 |
| 313 m |  |  |
| 328 m 323 w | 327 m, sh 323 m | e1g |
| 351 m, sh |  | 2 LA (M) |
| 351 s 356 s | 351 s 353 s | e2g1 |
| 383 w | 382 w 383 w | e2g1 + e2g2 |
| 420 vs 421 vs | 420 vs 420 vs | a1g |
| 439 vw | 438 w |  |
| 478 w | 478 w | e1g + LA (M) |
| 524 m 521 w | 524 w 521 m | e2g1 + LA (M) |
| 545 w | 547 w 547 w | e2g1 + e2g2 + LA (M) |
| 582 m 582 m | 582 m 581 m | a1g + LA (M)? |
| 698 w 699 w | 697 w 699 m | 2e2g1 |
| 765 vw 762 vw | 766 w 762 w | e2g1 + a1g ? |
| 833 vw | 832 w | 2a1g |

W, m, s and vs denote weak, medium, strong and very strong; sh stands for shoulder.
