# Supplementary figures and images for: Tungsten–niobium–sulfur composite nanotubes
Source: Royal Society of Chemistry journal article supplement (doi:10.1039/b007074m), 2001-01-01

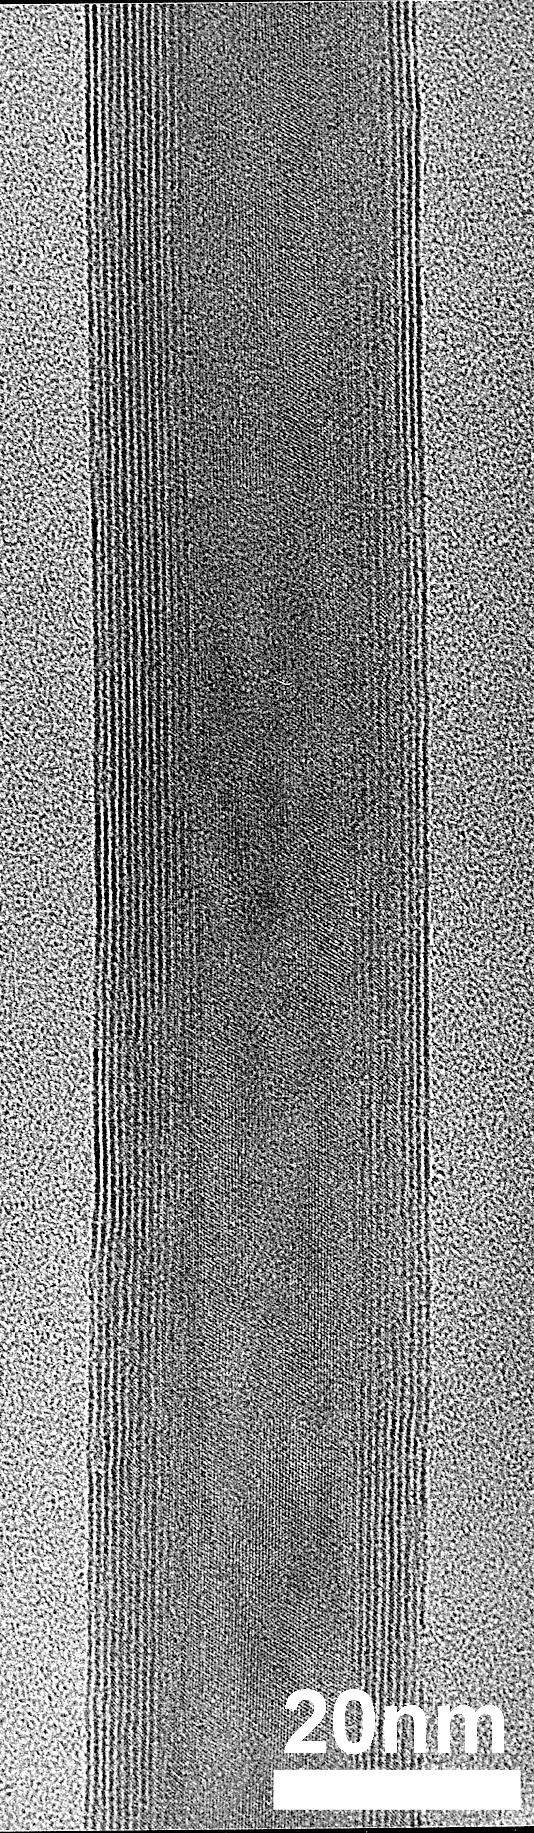


HRTEM image of a typical 10-layered W0.9Nb0.1S2 nanotube; layer separation = 0.62 nm.

Supplement: b007074m.doc [file b007074m.doc]
